# Supplementary material for: Enhancing Drug Efficacy against Mastitis Pathogens—An In Vitro Pilot Study in Staphylococcus aureus and Staphylococcus epidermidis
Source: MDPI journal article supplement (doi:10.3390/ani10112117), 2020-11-15
Supplement: s1 [file s1]

**Supplementary Table S1: List of conserved essential targets in 20 mastitis-causing pathogens and their corresponding drugs from Drugbank database.**

| S.No | Count | Description               | Drug                                                                                                                                                                                                                                                      |
|------|-------|---------------------------|-----------------------------------------------------------------------------------------------------------------------------------------------------------------------------------------------------------------------------------------------------------|
| 1    | 1     | 30S ribosomal protein S10 | Nitrofurantoin                                                                                                                                                                                                                                            |
| 2    | 14    | 30S ribosomal protein S12 | Framycetin; Amikacin; Tigecycline; Tobramycin; Gentamicin; Spectinomycin; Netilmicin; Neomycin; Streptomycin; Kanamycin; Ribostamycin; GENTAMICIN C1A; Arbekacin; 2-METHYLTHIO-N6-ISOPENTENYL-ADENOSINE-5'-MONOPHOSPHATE                                  |
| 3    | 2     | 30S ribosomal protein S13 | Tigecycline; 2-METHYLTHIO-N6-ISOPENTENYL-ADENOSINE-5'-MONOPHOSPHATE                                                                                                                                                                                       |
| 4    | 3     | 30S ribosomal protein S19 | Tigecycline; Tetracycline; 2-METHYLTHIO-N6-ISOPENTENYL-ADENOSINE-5'-MONOPHOSPHATE                                                                                                                                                                         |
| 5    | 2     | 30S ribosomal protein S3  | Tetracycline; 2-METHYLTHIO-N6-ISOPENTENYL-ADENOSINE-5'-MONOPHOSPHATE                                                                                                                                                                                      |
| 6    | 7     | 30S ribosomal protein S4  | Doxycycline; Lymecycline; Clomocycline; Oxytetracycline; Demeclocycline; Minocycline; 2-METHYLTHIO-N6-ISOPENTENYL-ADENOSINE-5'-MONOPHOSPHATE                                                                                                              |
| 7    | 1     | 30S ribosomal protein S5  | 2-METHYLTHIO-N6-ISOPENTENYL-ADENOSINE-5'-MONOPHOSPHATE                                                                                                                                                                                                    |
| 8    | 2     | 30S ribosomal protein S7  | Tetracycline; 2-METHYLTHIO-N6-ISOPENTENYL-ADENOSINE-5'-MONOPHOSPHATE                                                                                                                                                                                      |
| 9    | 2     | 30S ribosomal protein S8  | Tetracycline; 2-METHYLTHIO-N6-ISOPENTENYL-ADENOSINE-5'-MONOPHOSPHATE                                                                                                                                                                                      |
| 10   | 9     | 30S ribosomal protein S9  | Doxycycline; Lymecycline; Clomocycline; Tigecycline; Oxytetracycline; Demeclocycline; Minocycline; Rolitetracycline; 2-METHYLTHIO-N6-ISOPENTENYL-ADENOSINE-5'-MONOPHOSPHATE                                                                               |
| 11   | 2     | 50S ribosomal protein L11 | 8-Hydroxy-4-(1-Hydroxyethyl)Quinoline-2-Carboxylic Acid; (4s)-2-[(1e)-1-Aminoprop-1-Enyl]-4,5-Dihydro-1,3-Thiazole-4-Carboxylic Acid                                                                                                                      |
| 12   | 1     | 50S ribosomal protein L16 | Chloramphenicol                                                                                                                                                                                                                                           |
| 13   | 5     | aminotransferase class V  | Chloramphenicol; Selenocysteine; S-Mercaptocysteine; S-Selanyl Cysteine; L-2-amino-3-butynoic acid; 3'-O-N-Octanoyl-a-D-Glucopyranosyl-B-D-Fructofuranoside                                                                                               |
| 14   | 19    | DNA gyrase subunit A      | Ciprofloxacin; Rosoxacin; Moxifloxacin; Grepafloxacin; Enoxacin; Pefloxacin; Trovafloxacin; Cinoxacin; Lomefloxacin; Norfloxacin; Levofloxacin; Gemifloxacin; Ofloxacin; Sparfloxacin; Temafloxacin; Fleroxacin; Besifloxacin; Finafloxacin; Gatifloxacin |
| 15   | 5     | DNA ligase (NAD(+)) LigA  | N-[2-(2,4-diaminopyrido[2,3-d]pyrimidin-7-yl)-2-methylpropyl]-4-phenoxybenzamide; Nicotinamide Mononucleotide; 2-amino-7-fluoro-5-oxo-5H-chromeno[2,3-b]pyridine-3-carboxamide; 7-amino-2-tert-                                                           |

|    |   |                                                |                                                                                                                                                                                 |
|----|---|------------------------------------------------|---------------------------------------------------------------------------------------------------------------------------------------------------------------------------------|
|    |   |                                                | butyl-4- {[2-(1H-imidazol-4-yl)ethyl]amino}pyrido[2,3-d]pyrimidine-6-carboxamide; 7-amino-2-tert-butyl-4-(4-pyrimidin-2-yl)piperazin-1-yl)pyrido[2,3-d]pyrimidine-6-carboxamide |
| 16 | 4 | DNA recombination/repair protein RecA          | Phosphoaminophosphonic Acid-Adenylate Ester; Adenosine-5'-Diphosphate Monothiophosphate; 2'-Deoxyadenosine 5'-Triphosphate; Tetrafluoroaluminate Ion                            |
| 17 | 5 | DNA topoisomerase I                            | Thymidine-5'-Phosphate; Adenosine-3'-5'-Diphosphate; Thymidine-3',5'-Diphosphate; Pefloxacin; Novobiocin                                                                        |
| 18 | 3 | DNA-directed RNA polymerase subunit alpha      | Rifabutin; methyl [(1E,5R)-5-{(3S)-3-[(2E,4E)-2,5-dimethylocta-2,4-dienoyl]-2,4-dioxo-3,4-dihydro-2H-pyran-6-yl}hexylidene]carbamate; Myxopyronin B                             |
| 19 | 1 | guanylate kinase                               | Formic Acid                                                                                                                                                                     |
| 20 | 2 | Holliday junction DNA helicase RuvB            | Hexane-1,6-Diol; Adenine                                                                                                                                                        |
| 21 | 1 | methionyl-tRNA formyltransferase               | N-Formylmethionine                                                                                                                                                              |
| 22 | 1 | phenylalanine--tRNA ligase subunit beta        | 1-{3-[(4-pyridin-2-yl)piperazin-1-yl)sulfonyl]phenyl}-3-(1,3-thiazol-2-yl)urea                                                                                                  |
| 23 | 1 | phosphate acetyltransferase                    | Acetylphosphate                                                                                                                                                                 |
| 24 | 1 | ribosome biogenesis GTPase Der                 | Guanosine-5'-Diphosphate                                                                                                                                                        |
| 25 | 1 | ribosome maturation factor                     | Decyloxy-Methanol                                                                                                                                                               |
| 26 | 1 | RNA methyltransferase                          | S-Adenosyl-L-Homocysteine                                                                                                                                                       |
| 27 | 3 | RNA polymerase sigma factor                    | Fidaxomicin; Myxopyronin B; methyl [(1E,5R)-5-{(3S)-3-[(2E,4E)-2,5-dimethylocta-2,4-dienoyl]-2,4-dioxo-3,4-dihydro-2H-pyran-6-yl}hexylidene]carbamate                           |
| 28 | 2 | thioredoxin reductase                          | Flavin adenine dinucleotide; Azelaic Acid                                                                                                                                       |
| 29 | 1 | tRNA (guanosine(37)-N1)-methyltransferase TrmD | S-Adenosyl-L-Homocysteine                                                                                                                                                       |
| 30 | 1 | uracil phosphoribosyltransferase               | Uridine-5'-Monophosphate                                                                                                                                                        |

**Supplementary Table S2: List of unique drugs from Drugbank database for each of the 20 mastitis causing pathogens.**

Please see the attached .xls file for drugs.
